# Supplementary material for: Association between the Erythrocyte Membrane Fatty Acid Profile and Cognitive Function in the Overweight and Obese Population Aged from 45 to 75 Years Old
Source: MDPI journal article supplement (doi:10.3390/nu14040914), 2022-02-21
Supplement: s1 [file s1]

**Table S1.** The dietary intake fatty acids of the study population in three groups

| Variables | NW(n=275)    | OW(n=462)    | OB(n=337)                | P       |
|-----------|--------------|--------------|--------------------------|---------|
| SFAs%     | 26.196±7.010 | 26.566±5.760 | 26.285±5.510             | 0.476   |
| MUFAs%    | 35.822±7.620 | 36.309±5.700 | 36.258±4.960             | 0.891   |
| PUFAs%    | 33.137±8.500 | 34.513±7.470 | 34.942±7.010             | 0.080   |
| UN-Ks%    | 2.350±1.510  | 2.286±1.220  | 2.431±1.090 <sup>b</sup> | 0.006** |

Data are M ± SD. The discontinuous variable was tested with the Kruskal–Wallis test.. NW: normal weight group; OW: overweight group; OB: obese group; SFAs: saturated fatty acids; MUFAs: monounsaturated fatty acid; PUFAs: polyunsaturated fatty acids; UN-K: unknown; \*\*:P <0.01. <sup>b</sup>, indicated a significant difference compared with the overweight group.

**Table S2.** Associations between the scores in all cognitive domains measured by MMSE and the intake of dietary fatty acids in three groups

| Variables | MMSE   |         | MMSE orientation |        | MMSE memory |         | MMSE attention |       | MMSE delayed recall |         | MMSE language skills |        |
|-----------|--------|---------|------------------|--------|-------------|---------|----------------|-------|---------------------|---------|----------------------|--------|
|           | B      | P       | B                | P      | B           | P       | B              | P     | B                   | P       | B                    | P      |
| <b>NW</b> |        |         |                  |        |             |         |                |       |                     |         |                      |        |
| SFAs%     | -0.073 | 0.001** | -0.018           | 0.035* | -0.013      | 0.001** | -0.054         | 0.382 | -0.115              | 0.068   | -0.064               | 0.272  |
| MUFAs%    | 0.060  | 0.331   | -0.004           | 0.946  | 0.008       | 0.029*  | 0.034          | 0.554 | -0.062              | 0.294   | 0.007                | 0.904  |
| PUFAs%    | -0.046 | 0.403   | 0.000            | 0.998  | 0.065       | 0.307   | -0.045         | 0.442 | 0.002               | 0.967   | -0.065               | 0.254  |
| UN-Ks%    | 0.005  | 0.935   | 0.043            | 0.478  | 0.071       | 0.238   | 0.016          | 0.790 | 0.063               | 0.313   | -0.044               | 0.457  |
| <b>OW</b> |        |         |                  |        |             |         |                |       |                     |         |                      |        |
| SFAs%     | -0.040 | 0.362   | -0.006           | 0.895  | -0.018      | 0.694   | 0.005          | 0.912 | -0.019              | 0.008** | 0.015                | 0.731  |
| MUFAs%    | -0.009 | 0.844   | -0.013           | 0.785  | 0.030       | 0.523   | -0.027         | 0.553 | 0.035               | 0.457   | 0.020                | 0.639  |
| PUFAs%    | -0.065 | 0.135   | -0.054           | 0.241  | -0.045      | 0.330   | -0.089         | 0.052 | -0.082              | 0.100   | 0.002                | 0.965  |
| UN-Ks%    | 0.023  | 0.595   | 0.005            | 0.915  | -0.068      | 0.144   | -0.007         | 0.875 | 0.028               | 0.543   | 0.070                | 0.043* |
| <b>OB</b> |        |         |                  |        |             |         |                |       |                     |         |                      |        |
| SFAs%     | -0.037 | 0.454   | -0.029           | 0.580  | -0.038      | 0.475   | -0.006         | 0.913 | -0.018              | 0.039*  | 0.043                | 0.384  |
| MUFAs%    | -0.032 | 0.516   | -0.006           | 0.910  | -0.069      | 0.196   | -0.039         | 0.481 | 0.005               | 0.929   | -0.011               | 0.826  |
| PUFAs%    | -0.057 | 0.249   | -0.028           | 0.602  | -0.002      | 0.975   | -0.069         | 0.198 | 0.000               | 0.996   | -0.050               | 0.315  |
| UN-Ks%    | -0.004 | 0.935   | 0.038            | 0.472  | -0.024      | 0.646   | 0.006          | 0.914 | -0.066              | 0.223   | 0.014                | 0.782  |

Multiple linear regression adjusted for age, gender, BMI, waist-hip ratio, culture, smoking, drinking, exercise, history of hypertension, diabetes mellitus, hypertriglyceridemia, energy intakes. NW: normal weight group; OW: overweight group; OB: obese group; SFAs: saturated fatty acids; MUFAs: monounsaturated fatty acid; PUFAs: polyunsaturated fatty acids; UN-K: unknown; MMSE: Mini-Mental State Examination; \*:P <0.05; \*\*:P <0.01.

**Table S3.** Associations between the scores in all cognitive domains measured by MoCA and the intake of dietary fatty acids in three groups

| Variables | MoCA   |          | MoCA visuospatial function |        | MoCA naming |       | MoCA attention |       | MoCA language skills |          | MoCA abstracting |         | MoCA memory |        | MoCA orientation |        |
|-----------|--------|----------|----------------------------|--------|-------------|-------|----------------|-------|----------------------|----------|------------------|---------|-------------|--------|------------------|--------|
|           | B      | P        | B                          | P      | B           | P     | B              | P     | B                    | P        | B                | P       | B           | P      | B                | P      |
|           |        |          |                            |        |             |       |                |       |                      |          |                  |         |             |        |                  |        |
| <b>NW</b> |        |          |                            |        |             |       |                |       |                      |          |                  |         |             |        |                  |        |
| SFAs%     | -0.144 | <0.001** | -0.065                     | 0.251  | -0.015      | 0.799 | -0.019         | 0.754 | -0.032               | <0.001** | -0.022           | 0.003** | -0.120      | 0.065  | -0.015           | 0.023* |
| MUFAs%    | 0.101  | 0.003**  | -0.117                     | 0.050  | 0.066       | 0.271 | 0.031          | 0.579 | 0.035                | <0.001** | 0.097            | 0.157   | 0.024       | 0.042* | 0.018            | 0.785  |
| PUFAs%    | -0.066 | 0.014*   | 0.019                      | 0.027* | -0.088      | 0.138 | -0.047         | 0.404 | -0.028               | <0.001** | -0.015           | 0.012*  | -0.035      | 0.544  | -0.002           | 0.974  |
| UN-Ks%    | -0.080 | 0.129    | -0.031                     | 0.580  | -0.018      | 0.764 | 0.010          | 0.862 | -0.089               | 0.011*   | -0.111           | 0.064   | -0.043      | 0.467  | 0.032            | 0.603  |
| <b>OW</b> |        |          |                            |        |             |       |                |       |                      |          |                  |         |             |        |                  |        |
| SFAs%     | -0.035 | 0.409    | -0.027                     | 0.547  | 0.009       | 0.848 | 0.016          | 0.731 | -0.024               | 0.633    | -0.075           | 0.126   | -0.047      | 0.291  | -0.026           | 0.577  |
| MUFAs%    | 0.010  | 0.813    | 0.016                      | 0.713  | -0.017      | 0.712 | 0.058          | 0.193 | -0.028               | 0.553    | -0.053           | 0.251   | 0.044       | 0.328  | -0.034           | 0.468  |
| PUFAs%    | -0.025 | 0.548    | 0.071                      | 0.105  | -0.071      | 0.124 | -0.022         | 0.625 | -0.011               | 0.050    | -0.012           | 0.018*  | 0.047       | 0.297  | -0.028           | 0.544  |
| UN-Ks%    | 0.025  | 0.548    | -0.006                     | 0.892  | 0.028       | 0.543 | 0.031          | 0.490 | -0.012               | 0.792    | -0.035           | 0.434   | 0.078       | 0.082  | -0.005           | 0.922  |
| <b>OB</b> |        |          |                            |        |             |       |                |       |                      |          |                  |         |             |        |                  |        |
| SFAs%     | 0.000  | 0.995    | 0.036                      | 0.545  | 0.018       | 0.742 | 0.035          | 0.513 | 0.052                | 0.346    | -0.111           | 0.065   | -0.028      | 0.613  | -0.013           | 0.806  |
| MUFAs%    | -0.009 | 0.865    | 0.067                      | 0.220  | 0.005       | 0.925 | -0.003         | 0.955 | 0.034                | 0.535    | -0.055           | 0.313   | -0.053      | 0.333  | -0.038           | 0.477  |
| PUFAs%    | 0.001  | 0.992    | 0.023                      | 0.018* | 0.075       | 0.173 | 0.003          | 0.954 | -0.062               | 0.256    | -0.021           | 0.001** | 0.015       | 0.778  | -0.046           | 0.397  |
| UN-Ks%    | 0.031  | 0.544    | 0.010                      | 0.854  | 0.002       | 0.966 | 0.051          | 0.328 | 0.064                | 0.243    | -0.090           | 0.091   | -0.017      | 0.754  | 0.023            | 0.665  |

Multiple linear regression adjusted for age, gender, BMI, waist-hip ratio, culture, smoking, drinking, exercise, history of hypertension, diabetes mellitus, hypertriglyceridemia, energy intakes. NW: normal weight group; OW: overweight group; OB: obese group; SFAs: saturated fatty acids; MUFAs: monounsaturated fatty acid; PUFAs: polyunsaturated fatty acids; UN-K: unknown; MoCA: Montreal Cognitive Assessment; \*:P <0.05; \*\*:P <0.01.
